# Supplementary material for: Multivariate effects of pH, salt, and Zn2+ ions on Aβ40 fibrillation
Source: Springer Nature journal article supplement (doi:10.1038/s42004-022-00786-1), 2022-12-13
Supplement: MOESM1 [file 42004_2022_786_MOESM1_ESM.pdf]

# Supplementary information

## Multivariate effects of pH, salt, and Zn<sup>2+</sup> ions on A $\beta$ <sub>40</sub> fibrillation

Hongzhi Wang<sup>1</sup>, Jinming Wu<sup>1</sup>, Rebecca Sternke-Hoffmann<sup>1</sup>, Wenwei Zheng<sup>2</sup>, Cecilia Mörmann<sup>1,3</sup>, Jinghui Luo<sup>1\*</sup>

1. Department of Biology and Chemistry, Paul Scherrer Institute, 5232 Villigen, Switzerland.
2. College of Integrative Sciences and Arts, Arizona State University, AZ 85212, Mesa, USA.
3. Department of Biosciences and Nutrition, Karolinska Institutet, 141 52 Huddinge, Sweden.

\*Corresponding author: Jinghui.luo@psi.ch, Tel: +41 56 310 47 64



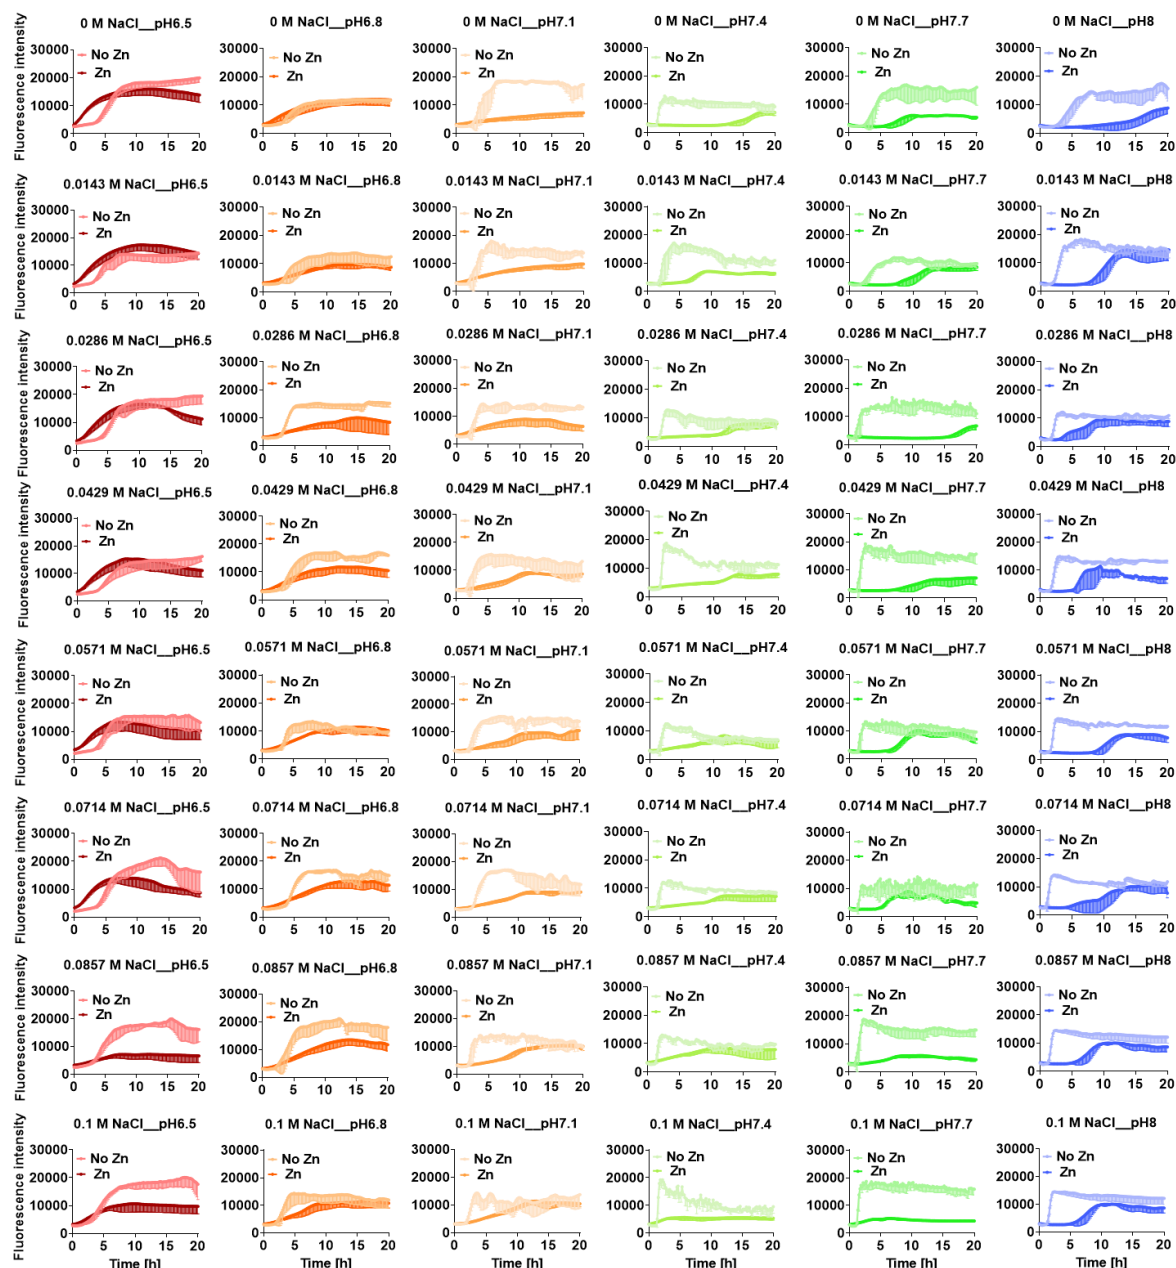

**Supplementary Figure 1. Effects of pH, NaCl, and  $\text{Zn}^{2+}$  ions on  $\text{A}\beta_{40}$  fibrillation.** Aggregation kinetics of 10  $\mu\text{M}$   $\text{A}\beta_{40}$  were monitored by ThT assays at 37°C under quiescent conditions. The results indicate that effects of pH, salt, and  $\text{Zn}^{2+}$  ions on  $\text{A}\beta_{40}$  aggregation are influenced mutually. All original ThT data were smoothed by choosing the Savitzky-Golay method with a points of Window from 5 to 30 using the Origin software. The measurement variability is represented by error bars from standard error of the mean (SEM) of 3 replicas.



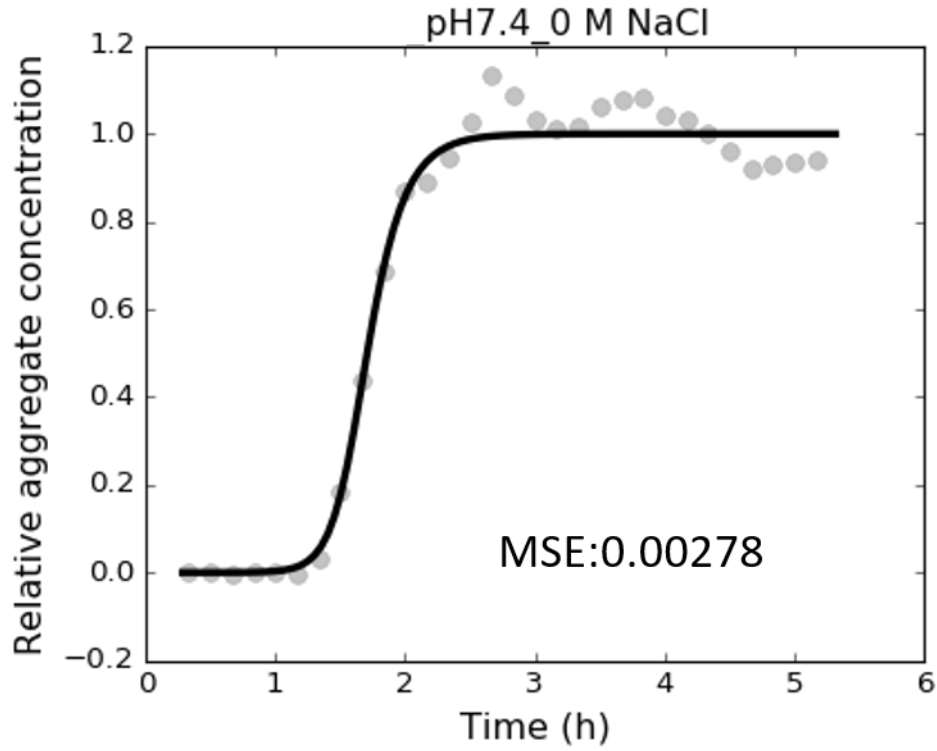

**Supplementary Figure 2. Global fitting analysis of ThT data from 10  $\mu$ M  $A\beta_{40}$  alone at pH 7.4, in the absence of NaCl and  $Zn^{2+}$  ions.**  $A\beta_{40}$  fibrillation is a secondary nucleation dominated process. Following this fit, a set of parameters were obtained:  $k_n = 0.00047$  in concentration<sup>-nc+1</sup> time<sup>-1</sup>;  $k_2 = 4e^{+7}$  in concentration<sup>-n2</sup> time<sup>-1</sup>;  $k_+ = 9.49e^{+8}$  in concentration<sup>-1</sup> time<sup>-1</sup>, which were used as the initial guess values for the following fitting of  $A\beta_{40}$  at varied NaCl concentrations and pH values, in the absence or presence of  $Zn^{2+}$ .



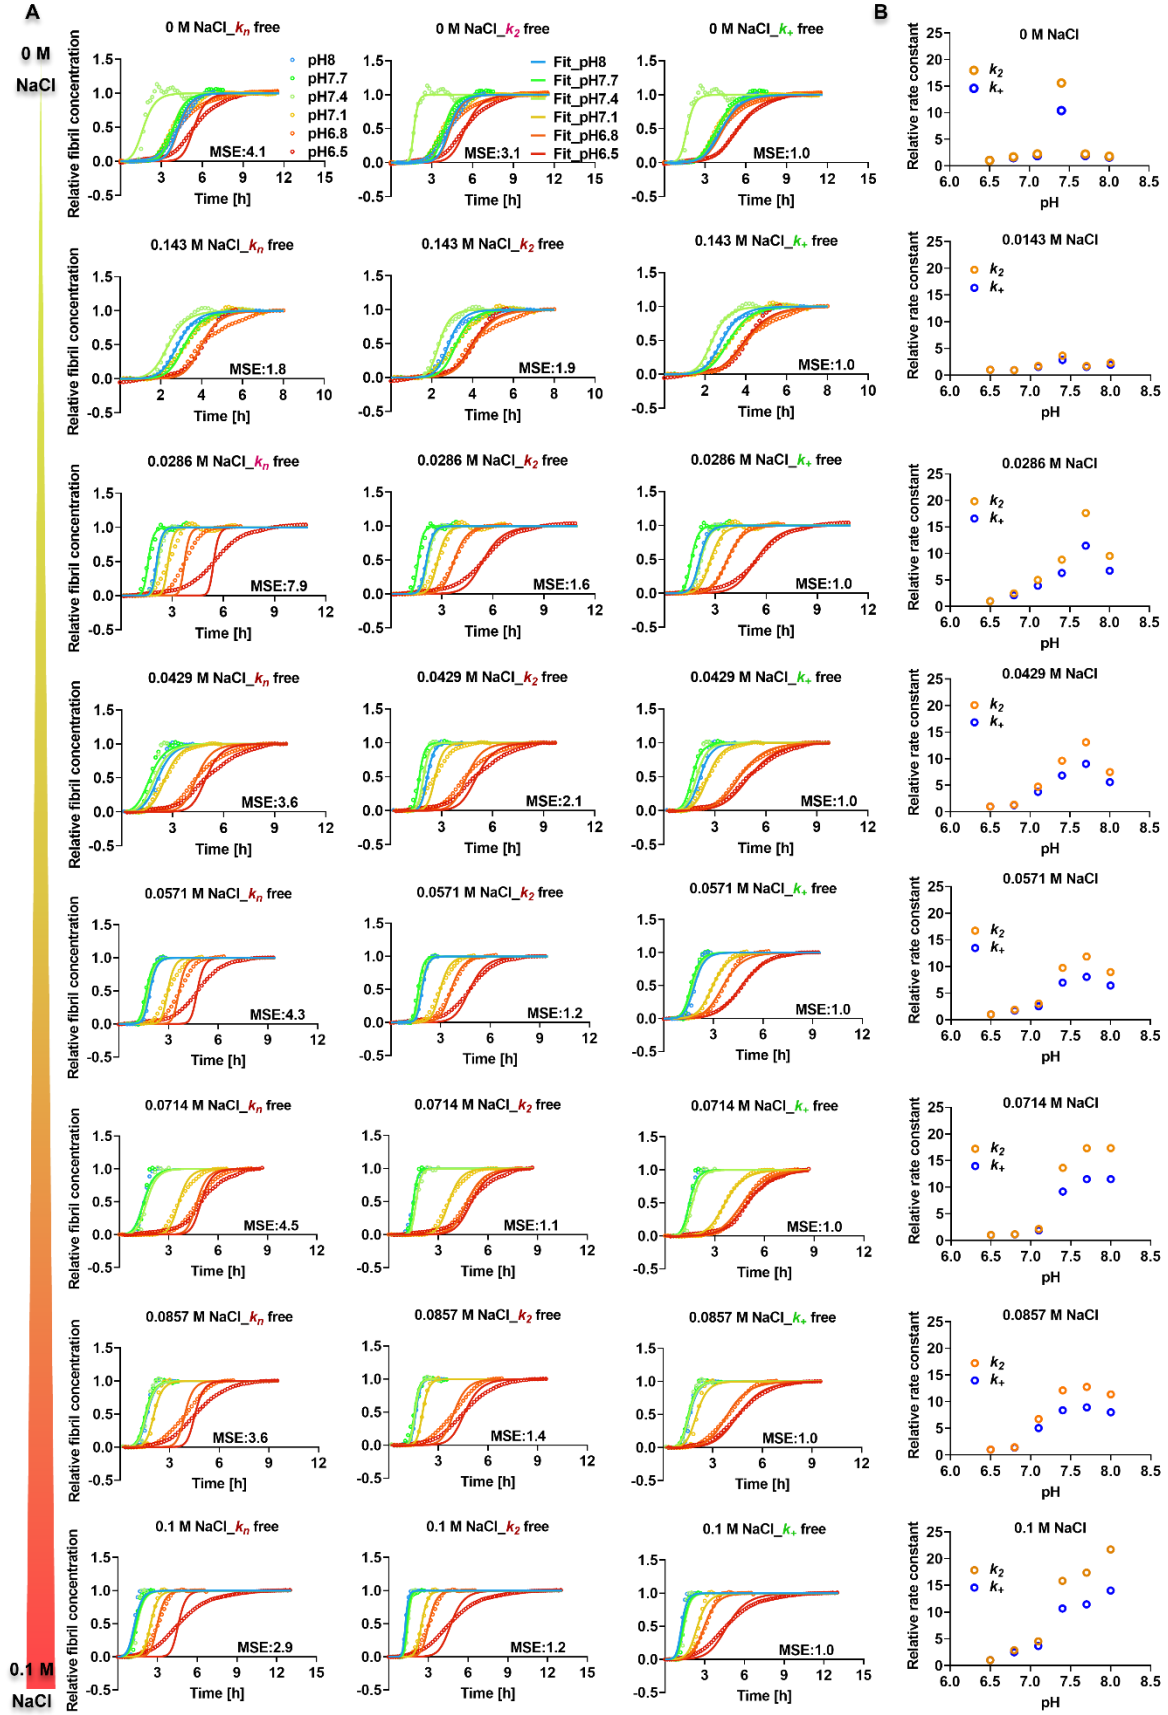



**Supplementary Figure 3. Salts mainly influence the secondary processes of A $\beta$ <sub>40</sub> fibrillation in the absence of Zn<sup>2+</sup> ions.** (A) Aggregation kinetics of 10  $\mu$ M A $\beta$ <sub>40</sub> at different pH values (6.5, 6.8, 7.1, 7.4, 7.7, and 8) and NaCl concentrations (0, 0.0143, 0.0285, 0.0429, 0.0571, 0.0714, 0.0857, and 0.1 M) were monitored by ThT fluorescence over time (the raw data can be found in **Fig.1**). The ThT data were then globally fitted with the same method used in **Fig.3** in the main manuscript by using the *AmyloFit* online software server<sup>38</sup>. ♦ The mean square error (MSE) values for each set of A $\beta$ <sub>40</sub> samples were normalized against the one with the best fit (lowest MSE value). (B) Relative rate constants (relative to the rate constants of A $\beta$ <sub>40</sub> at 0 M NaCl) derived from global fitting for A $\beta$ <sub>40</sub> samples at different pH values and salt concentrations. All original ThT data were smoothed by choosing the Savitzky-Golay method with a points of Window from 5 to 30 using the Origin software.

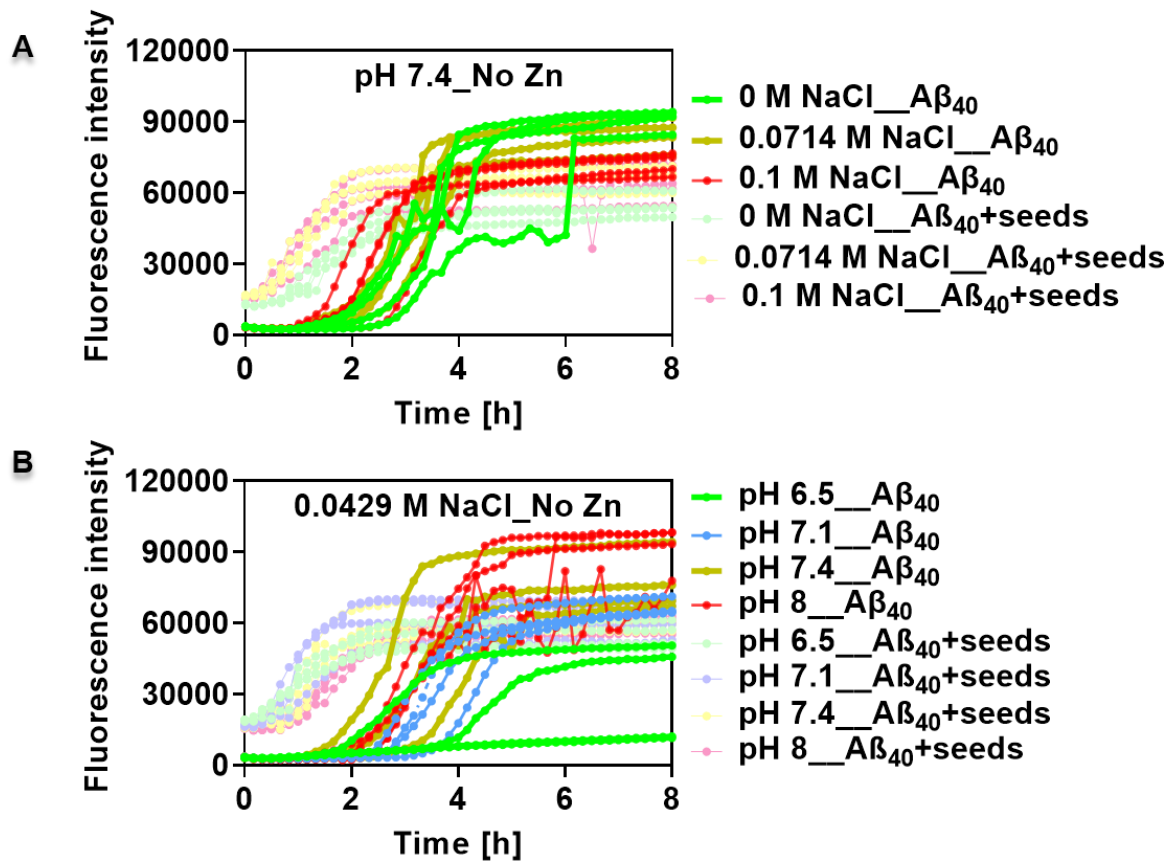

**Supplementary Figure 4. Seeding experiments.** The ThT kinetic experiments were performed with 10  $\mu$ M A $\beta$ <sub>40</sub> in 20 mM potassium phosphate buffer at NaCl concentrations of 0, 0.0714, and 0.1 M, pH 7.4, or pH 6.5, pH 7.1, pH 7.4, and pH 8, NaCl concentration of 0.0429 M, in the absence or presence of 1.5  $\mu$ M A $\beta$ <sub>40</sub> seeds, at 37 °C without agitation.
